# Supplementary material for: Improved prognostication of glioblastoma beyond molecular subtyping by transcriptional profiling of the tumor microenvironment
Source: PubMed Central journal article supplement (PMC7191188; doi:10.1002/1878-0261.12668), 2020-04-04
Supplement: MOL2-14-1016-s001.pdf [file MOL2-14-1016-s001.pdf]

# Supplementary material

## Content

### i. Tables

- **Supplementary Table 1 (pages 5-9)**

Summary of in-house patient characteristics (n=67)

- **Supplementary Table 2 (pages 10-11)**

Regulation of immune suppressor genes in the pGBM infiltration clusters of the exploratory cohort.

- **Supplementary Table 3 (pages 12-14)**

Regulation of immune effector genes in the pGBM infiltration clusters of the exploratory cohort.

- **Supplementary Table 4 (page 15)**

Univariable and multivariable Cox's proportional hazard analyses, with survival as endpoint, in the exploratory cohort.

- **Supplementary Table 5 (page 16)**

Univariable and multivariable Cox's proportional hazard analyses, with survival as endpoint, in the validation cohort.

- **Supplementary Table 6 (page 17)**

Univariable and multivariable Cox's proportional hazard analyses, with survival as endpoint, in the pooled exploratory and validation cohorts.

- **Supplementary Table 7 (page 18)**

Effect of molecular subtypes on survival in pGBM-I1 and pGBM-I2, in the pooled exploratory and validation cohorts

## ii. Figures

- **Supplementary Figure 1 (page 19)**

Selection of the number of pGBM infiltration clusters in the exploratory cohort.

- **Supplementary Figure 2 (page 20)**

Estimation of tumor infiltration across samples of the exploratory cohort.

- **Supplementary Figure 3 (page 21)**

Differential abundance of immune and stromal cell populations between pGBM-I1 and pGBM-I2, in the validation dataset.

- **Supplementary Figure 4 (page 22)**

Expression levels of selected genes in the mesenchymal subtype vs. other subtypes (neural, proneural and classical), in the exploratory cohort.

- **Supplementary Figure 5 (page 23)**

Comparison of abundance of immune and stromal cell populations in the pGBM molecular subtypes (exploratory cohort).

- **Supplementary Figure 6 (page 24)**

Molecular characterization of the pGBM-I1 and pGBM-I2 clusters according to the Verhaak's signatures in the validation dataset.

- **Supplementary Figure 7 (page 25)**

Heatmaps of MCPcounter scores in mesenchymal tumors of the exploratory cohort.

- **Supplementary Figure 8 (page 26)**

Heatmaps of MCPcounter scores in neural tumors of the exploratory cohort.

- **Supplementary Figure 9 (page 27)**

Heatmaps of MCPcounter scores in classical tumors of the exploratory cohort.

- **Supplementary Figure 10 (page 28)**

Heatmaps of MCPcounter scores in proneural tumors of the exploratory cohort.

- **Supplementary Figure 11 (page 29)**

Kaplan-Meier curves modeling the effect of GBM molecular classification on survival in the validation cohort.

- **Supplementary Figure 12 (page 30)**

Kaplan-Meier curves modeling the effect of tumor infiltration on overall survival in the validation cohort.

- **Supplementary Figure 13 (pages 31)**

Effect of molecular subtypes on survival, in the pooled exploratory and validation cohorts, in (A) pGBM-I1 and (B) pGBM-I2.

| <b>Sample ID</b>     | <b>Gender</b> | <b>Age<sup>c</sup></b> | <b>Histopathological diagnosis</b> | <b>WHO grade</b> | <b>IDH1/IDH2 status</b> | <b>Combined +7-10<sup>d</sup></b> | <b>LOH 1p/19q</b> | <b>MGMT promoter methylation<sup>e</sup></b> |
|----------------------|---------------|------------------------|------------------------------------|------------------|-------------------------|-----------------------------------|-------------------|----------------------------------------------|
| 06-1563 <sup>a</sup> | Male          | 35                     | A                                  | II               | MUT                     | NA                                | No                | U/M                                          |
| 07-0658              | Male          | 25                     | A                                  | II               | MUT                     | NA                                | No                | U/M                                          |
| 07-0841              | Male          | 32                     | A                                  | II               | MUT                     | NA                                | No                | NA                                           |
| 07-1082              | Male          | 28                     | A                                  | II               | MUT                     | NA                                | No                | U/M                                          |
| 08-0706              | Female        | 42                     | A                                  | II               | MUT                     | NA                                | No                | U/M                                          |
| 08-1168              | Female        | 43                     | A                                  | II               | MUT                     | NA                                | No                | U/M                                          |
| 08-1169              | Male          | 37                     | A                                  | II               | MUT                     | NA                                | No                | M/M                                          |
| 1002-0669            | Male          | 31                     | A                                  | II               | MUT                     | NA                                | No                | NA                                           |
| 07-0025              | Male          | 64                     | A                                  | II               | MUT                     | NA                                | No                | U/M                                          |
| 07-0041 <sup>b</sup> | Female        | 29                     | A                                  | II               | MUT                     | NA                                | No                | U/M                                          |
| 07-0139              | Male          | 40                     | A                                  | II               | MUT                     | NA                                | No                | M/M                                          |
| 07-0350              | Male          | 35                     | A                                  | II               | MUT                     | NA                                | No                | M/M                                          |

|           |        |    |      |    |     |     |     |     |
|-----------|--------|----|------|----|-----|-----|-----|-----|
| 07-0372   | Female | 32 | A    | II | MUT | NA  | No  | M/M |
| 07-0450   | Male   | 36 | O    | II | MUT | NA  | Yes | M/M |
| 07-0697   | Male   | 51 | A    | II | MUT | NA  | No  | M/M |
| 08-1321   | Female | 41 | A    | II | MUT | NA  | No  | NA  |
| 08-1498   | Female | 61 | A    | II | MUT | NA  | No  | U/M |
| 08-1510   | Male   | 38 | A    | II | MUT | NA  | No  | U/M |
| 08-1592   | Male   | 55 | O    | II | MUT | NA  | Yes | M/M |
| 06-1206   | Female | 36 | O    | II | MUT | NA  | Yes | M/M |
| 06-1467   | Female | 30 | O    | II | MUT | NA  | Yes | U/M |
| 07-0704   | Male   | 45 | O    | II | MUT | NA  | Yes | U/M |
| 07-1341   | Male   | 23 | O    | II | MUT | NA  | Yes | U/M |
| 07-1656   | Female | 51 | A    | II | WT  | NA  | No  | U/U |
| 09-0349   | Female | 36 | O    | II | NA  | NA  | Yes | NA  |
| 1002-0413 | Female | 40 | O    | II | MUT | NA  | Yes | NA  |
| 06-0811   | Male   | 70 | pGBM | IV | WT  | NA  | NA  | U/U |
| 06-0813   | Female | 82 | pGBM | IV | NA  | NA  | NA  | NA  |
| 06-0823   | Male   | 76 | pGBM | IV | WT  | Yes | NA  | M/M |

|         |        |    |      |    |    |     |    |     |
|---------|--------|----|------|----|----|-----|----|-----|
| 06-0849 | Male   | 56 | pGBM | IV | WT | Yes | NA | U/U |
| 06-0984 | Male   | 63 | pGBM | IV | WT | No  | NA | M/M |
| 06-1051 | Male   | 61 | pGBM | IV | WT | Yes | NA | U/U |
| 06-1126 | Female | 59 | pGBM | IV | WT | Yes | NA | M/M |
| 06-1163 | Female | 84 | pGBM | IV | NA | NA  | NA | NA  |
| 06-1277 | Male   | 70 | pGBM | IV | WT | Yes | NA | U/U |
| 06-1471 | Female | 79 | pGBM | IV | WT | No  | NA | M/M |
| 06-1591 | Female | 58 | pGBM | IV | WT | Yes | NA | U/M |
| 06-1603 | Male   | 53 | pGBM | IV | WT | Yes | NA | U/M |
| 07-0173 | Female | 46 | pGBM | IV | WT | Yes | NA | U/U |
| 07-0666 | Male   | 58 | pGBM | IV | NA | No  | NA | NA  |
| 07-0860 | Male   | 65 | pGBM | IV | WT | Yes | NA | U/U |
| 07-0968 | Male   | 62 | pGBM | IV | WT | Yes | NA | U/M |
| 07-1024 | Male   | 81 | pGBM | IV | WT | NA  | NA | NA  |
| 07-1380 | Male   | 70 | pGBM | IV | WT | Yes | NA | M/M |
| 07-1562 | Male   | 56 | pGBM | IV | WT | NA  | NA | U/U |
| 07-1568 | Male   | 55 | pGBM | IV | WT | No  | NA | M/M |

|           |        |    |      |    |     |     |    |     |
|-----------|--------|----|------|----|-----|-----|----|-----|
| 08-0123   | Female | 54 | pGBM | IV | WT  | NA  | NA | M/M |
| 08-0193   | Male   | 48 | pGBM | IV | WT  | NA  | NA | U/U |
| 08-0194   | Female | 65 | pGBM | IV | WT  | NA  | NA | M/M |
| 08-0269   | Male   | 59 | pGBM | IV | WT  | NA  | NA | U/U |
| 08-0308   | Female | 36 | pGBM | IV | WT  | NA  | NA | U/U |
| 08-0315   | Female | 61 | pGBM | IV | WT  | NA  | NA | M/M |
| 08-0316   | Female | 81 | pGBM | IV | WT  | NA  | NA | NA  |
| 08-0417   | Female | 63 | pGBM | IV | WT  | NA  | NA | M/M |
| 08-0723   | Female | 56 | pGBM | IV | WT  | NA  | NA | U/U |
| 08-1253   | Male   | 50 | pGBM | IV | WT  | NA  | NA | U/U |
| 08-1516   | Male   | 81 | pGBM | IV | WT  | NA  | NA | U/U |
| 08-1556   | Male   | 75 | pGBM | IV | WT  | NA  | NA | U/U |
| 09-0133   | Male   | 55 | pGBM | IV | WT  | NA  | NA | M/M |
| 09-0201   | Female | 67 | pGBM | IV | WT  | NA  | NA | NA  |
| 0992-0111 | Female | 82 | pGBM | IV | WT  | NA  | NA | NA  |
| 0992-0314 | Female | 56 | pGBM | IV | WT  | NA  | NA | NA  |
| 06-1223   | Male   | 46 | sGBM | IV | MUT | Yes | NA | M/M |



|                      |        |    |      |    |     |    |    |     |
|----------------------|--------|----|------|----|-----|----|----|-----|
| 07-0196              | Male   | 48 | sGBM | IV | MUT | NA | NA | U/M |
| 08-0243              | Female | 38 | sGBM | IV | MUT | NA | NA | NA  |
| 09-0194 <sup>a</sup> | Male   | 38 | sGBM | IV | MUT | NA | NA | NA  |
| 09-0380 <sup>b</sup> | Female | 32 | sGBM | IV | MUT | NA | NA | NA  |

<sup>a</sup> Samples originate from the same patient. <sup>b</sup> Samples originate from the same patient. <sup>c</sup> Age in years, <sup>d</sup> combined gain of chromosome 7 and loss of chromosome 10 (+7/-10) <sup>e</sup> Methylation status as determined by qMSP and Pyrosequencing (qMSP result / pyrosequencing result).

**Supplementary Table 1:** Summary of in-house patient characteristics (n = 67).

| <b>Gene</b>       | <b>Regulation in pGBM-I1</b><br>(vs. Normal, FDR<0.05) | <b>Regulation in pGBM-I2</b><br>(vs. Normal, FDR<0.05) | <b>Regulation in pGBM-I1</b><br>(vs. pGBM-I2, FDR<0.05) |
|-------------------|--------------------------------------------------------|--------------------------------------------------------|---------------------------------------------------------|
| <i>VEGFA</i>      | -                                                      | -                                                      | Up                                                      |
| <i>IL10</i>       | Up                                                     | -                                                      | Up                                                      |
| <i>IL23A</i>      | -                                                      | -                                                      | Up                                                      |
| <i>TGFB1</i>      | Up                                                     | -                                                      | Up                                                      |
| <i>SPATA2</i>     | Down                                                   | Down                                                   | -                                                       |
| <i>PDL1/CD274</i> | -                                                      | -                                                      | Up                                                      |
| <i>CTLA4</i>      | -                                                      | -                                                      | Up                                                      |
| <i>CSF1</i>       | Up                                                     | -                                                      | Up                                                      |
| <i>CCL2</i>       | Up                                                     | -                                                      | Up                                                      |
| <i>CCL22</i>      | -                                                      | -                                                      | Up                                                      |
| <i>CD163</i>      | Up                                                     | -                                                      | Up                                                      |
| <i>MSR1</i>       | Up                                                     | -                                                      | Up                                                      |

|               |    |      |      |
|---------------|----|------|------|
| <i>GDF15</i>  | -  | -    | Up   |
| <i>ARG1</i>   | -  | Down | -    |
| <i>CD47</i>   | -  | -    | -    |
| <i>IL6</i>    | -  | -    | Up   |
| <i>IL6ST</i>  | Up | Up   | -    |
| <i>JAK2</i>   | -  | -    | -    |
| <i>STAT3</i>  | Up | Up   | Up   |
| <i>PIM1</i>   | -  | -    | Up   |
| <i>SOCS3</i>  | -  | -    | Up   |
| <i>STAT5A</i> | -  | -    | Up   |
| <i>STAT5B</i> | -  | -    | Down |
| <i>CD4</i>    | Up | -    | Up   |
| <i>ICOS</i>   | -  | -    | Up   |
| <i>FOXP3</i>  | -  | -    | Up   |

**Supplementary Table 2:** Regulation of immune suppressor genes in the pGBM infiltration clusters of the exploratory cohort.

| <b>Gene</b>  | <b>Regulation in pGBM-I1</b><br>(vs. Normal, FDR<0.05) | <b>Regulation in pGBM-I2</b><br>(vs. Normal, FDR<0.05) | <b>Regulation in pGBM-I1</b><br>(vs. pGBM-I2, FDR<0.05) |
|--------------|--------------------------------------------------------|--------------------------------------------------------|---------------------------------------------------------|
| <i>IFN-γ</i> | -                                                      | -                                                      | Up                                                      |
| <i>IL1A</i>  | -                                                      | -                                                      | Up                                                      |
| <i>IL2</i>   | -                                                      | -                                                      | -                                                       |
| <i>IL4</i>   | -                                                      | -                                                      | -                                                       |
| <i>IL7</i>   | -                                                      | -                                                      | Up                                                      |
| <i>IL12A</i> | -                                                      | -                                                      | Down                                                    |
| <i>IL15</i>  | -                                                      | -                                                      | Up                                                      |
| <i>TNF</i>   | -                                                      | -                                                      | Up                                                      |
| <i>CD3D</i>  | -                                                      | -                                                      | Up                                                      |
| <i>CD8A</i>  | -                                                      | -                                                      | Up                                                      |
| <i>CD8B</i>  | -                                                      | -                                                      | Up                                                      |
| <i>CD80</i>  | -                                                      | -                                                      | Up                                                      |
| <i>CD86</i>  | Up                                                     | -                                                      | Up                                                      |

|                 |      |      |      |
|-----------------|------|------|------|
| <i>CD40</i>     | -    | -    | Up   |
| <i>HLA-B</i>    | Up   | -    | Up   |
| <i>HLA-DRA</i>  | Up   | -    | Up   |
| <i>HLA-DBP1</i> | Up   | -    | Up   |
| <i>B2M</i>      | Up   | Up   | -    |
| <i>RELA</i>     | Up   | Up   | Up   |
| <i>STAT1</i>    | -    | Up   | Down |
| <i>IRAK1</i>    | Up   | -    | Up   |
| <i>STAT4</i>    | Down | Down | Up   |
| <i>TBX21</i>    | -    | -    | Up   |
| <i>CD226</i>    | Up   | -    | Up   |
| <i>IRF7</i>     | -    | -    | Up   |
| <i>NCR1</i>     | -    | -    | Up   |
| <i>NCR3</i>     | -    | -    | Up   |
| <i>NCR2</i>     | -    | -    | Up   |

|              |    |    |    |
|--------------|----|----|----|
| <i>KLRD1</i> | -  | -  | Up |
| <i>CD244</i> | -  | -  | Up |
| <i>TLR2</i>  | Up | -  | Up |
| <i>TLR3</i>  | Up | Up | -  |
| <i>TLR4</i>  | -  | -  | Up |
| <i>TLR9</i>  | -  | -  | Up |
| <i>TREM1</i> | Up | -  | Up |
| <i>TREM2</i> | Up | -  | Up |
| <i>MIF</i>   | -  | -  | Up |

**Supplementary Table 3:** Regulation of immune effector genes in the pGBM infiltration clusters of the exploratory cohort.

|                    |             |              |            | Univariable models                  |                 | Multivariable model |                 |
|--------------------|-------------|--------------|------------|-------------------------------------|-----------------|---------------------|-----------------|
|                    |             | Patients (n) | Events (n) | HR (95% CI)                         | <i>p</i> -value | HR (95% CI)         | <i>p</i> -value |
| Molecular classif. |             |              |            | <i>p</i> -value of the model: 0.086 |                 |                     |                 |
|                    | Classical   | 113          | 73         | -                                   |                 | 1.00 (ref)          |                 |
|                    | Mesenchymal | 137          | 101        | -                                   |                 | 1.71 (1.23-2.39)    | <b>0.0016</b>   |
|                    | Neural      | 73           | 52         | -                                   |                 | 1.21 (0.85-1.73)    | 0.29            |
|                    | Proneural   | 105          | 75         | -                                   |                 | 1.34 (0.97-1.86)    | 0.080           |
| Immune classif.    |             |              |            | <i>p</i> -value of the model: 0.032 |                 |                     |                 |
|                    | pGBM-I1     | 192          | 130        | 1.00 (ref)                          |                 | 1.00 (ref)          |                 |
|                    | pGBM-I2     | 236          | 171        | 1.29 (1.02-1.61)                    | <b>0.032</b>    | 1.51(1.14-2.00)     | <b>0.0037</b>   |

**Supplementary Table 4:** Univariable and multivariable Cox's proportional hazard analyses, with survival as endpoint, in the exploratory cohort.

|                    |             |              |            | Univariable models                  |                 | Multivariable model |                 |
|--------------------|-------------|--------------|------------|-------------------------------------|-----------------|---------------------|-----------------|
|                    |             | Patients (n) | Events (n) | HR (95% CI)                         | <i>p</i> -value | HR (95% CI)         | <i>p</i> -value |
| Molecular classif. |             |              |            | <i>p</i> -value of the model: 0.033 |                 |                     |                 |
|                    | Classical   | 32           | 21         | 1.00 (ref)                          |                 | 1.00 (ref)          |                 |
|                    | Mesenchymal | 35           | 27         | 1.02 (0.58-1.81)                    | 0.94            | 1.30 (0.70-2.43)    | 0.41            |
|                    | Neural      | 29           | 16         | 0.60 (0.31-1.15)                    | 0.12            | 0.61 (0.32-1.18)    | 0.15            |
|                    | Proneural   | 28           | 12         | 0.42 (0.21-0.86)                    | <b>0.018</b>    | 0.39 (0.19-0.80)    | <b>0.010</b>    |
| Immune classif.    |             |              |            | <i>p</i> -value of the model: 0.47  |                 |                     |                 |
|                    | pGBM-I1     | 57           | 35         | -                                   |                 | 1.00 (ref)          |                 |
|                    | pGBM-I2     | 67           | 41         | -                                   |                 | 1.69 (1.00-2.84)    | <b>0.048</b>    |

**Supplementary Table 5:** Univariable and multivariable Cox's proportional hazard analyses, with survival as endpoint, in the validation cohort.



|                    |             |              |            | Univariable models                   |                 | Multivariable model |                 |
|--------------------|-------------|--------------|------------|--------------------------------------|-----------------|---------------------|-----------------|
|                    |             | Patients (n) | Events (n) | HR (95% CI)                          | <i>p</i> -value | HR (95% CI)         | <i>p</i> -value |
| Molecular classif. |             |              |            | <i>p</i> -value of the model: 0.17   |                 |                     |                 |
|                    | Classical   | 145          | 94         | -                                    |                 | 1.00 (ref)          |                 |
|                    | Mesenchymal | 172          | 128        | -                                    |                 | 1.63 (1.21-2.18)    | <b>0.0012</b>   |
|                    | Neural      | 102          | 68         | -                                    |                 | 1.09 (0.80-1.49)    | 0.59            |
|                    | Proneural   | 133          | 87         | -                                    |                 | 1.09 (0.81-1.47)    | 0.57            |
| Immune classif.    |             |              |            | <i>p</i> -value of the model: 0.025  |                 |                     |                 |
|                    | pGBM-I1     | 249          | 165        | 1.00 (ref)                           |                 | 1.00 (ref)          |                 |
|                    | pGBM-I2     | 303          | 212        | 1.26 (1.03-1.55)                     | <b>0.025</b>    | 1.55 (1.21-1.97)    | <b>4.8e-4</b>   |
| Cohort             |             |              |            | <i>p</i> -value of the model: 0.0022 |                 |                     |                 |
|                    | In-house    | 36           | 30         | 1.00 (ref)                           |                 | 1.00 (ref)          |                 |
|                    | TCGA        | 392          | 271        | 0.075 (0.49-1.04)                    |                 | 0.76 (0.51-1.11)    | 0.15            |
|                    | Rembrandt   | 124          | 76         | 0.0013 (0.33-0.76)                   |                 | 0.53 (0.34-0.82)    | <b>0.0043</b>   |

**Supplementary Table 6:** Univariable and multivariable Cox's proportional hazard analyses, with survival as endpoint, in the pooled exploratory and validation cohorts.

|                    | pGBM-I1      |            |                  |                 | pGBM-I2      |            |                  |                 |
|--------------------|--------------|------------|------------------|-----------------|--------------|------------|------------------|-----------------|
|                    | Patients (n) | Events (n) | HR (95% CI)      | <i>p</i> -value | Patients (n) | Events (n) | HR (95% CI)      | <i>p</i> -value |
| Molecular classif. |              |            |                  |                 |              |            |                  |                 |
| Classical          | 51           | 30         | 1.00 (ref)       |                 | 94           | 64         | 1.00 (ref)       |                 |
| Mesenchymal        | 140          | 100        | 1.55 (1.03-2.33) | <b>0.037</b>    | 32           | 28         | 1.81 (1.15-2.86) | <b>0.011</b>    |
| Neural             | 34           | 18         | 0.87 (0.48-1.57) | 0.64            | 68           | 50         | 1.19 (0.82-1.73) | 0.36            |
| Proneural          | 24           | 17         | 1.52 (0.84-2.78) | 0.17            | 109          | 70         | 1.02 (0.73-1.44) | 0.90            |
| Cohort             |              |            |                  |                 |              |            |                  |                 |
| In-house           | 19           | 15         | 1.00 (ref)       |                 | 17           | 15         | 1.00 (ref)       |                 |
| TCGA               | 173          | 115        | 0.70 (0.41-1.19) | 0.19            | 219          | 156        | 0.84 (0.48-1.47) | 0.55            |
| Rembrandt          | 57           | 35         | 0.52 (0.28-0.96) | <b>0.037</b>    | 67           | 41         | 0.56 (0.30-1.04) | 0.066           |

**Supplementary Table 7:** Effect of molecular subtypes on survival in pGBM-I1 and pGBM-I2, in the pooled exploratory and validation cohorts.

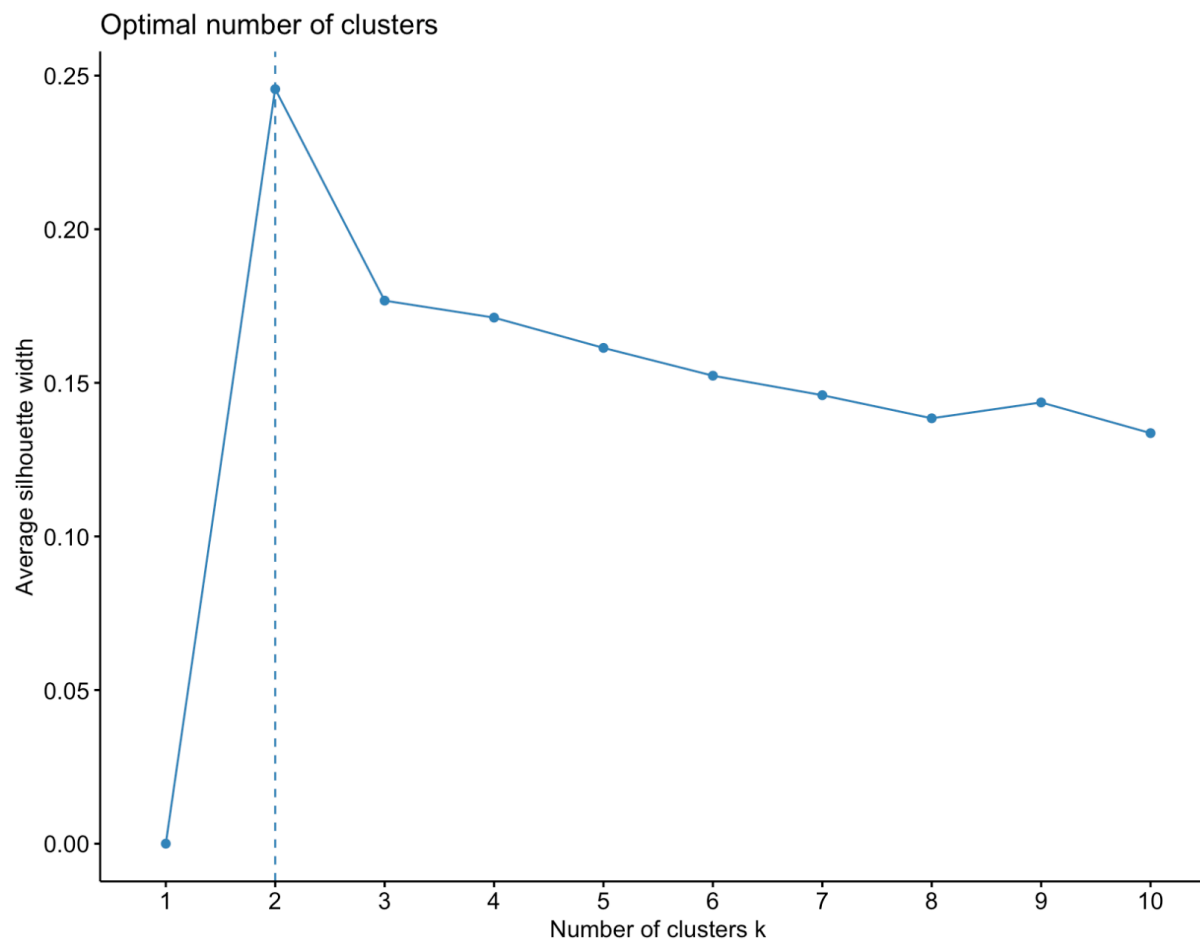

**Supplementary Figure 1:** Selection of the number of pGBM infiltration clusters in the exploratory cohort. The silhouette plot identifies the optimal number of clusters, which maximizes the average silhouette width over a range of possible values ( $k = 1$  to  $10$ ).

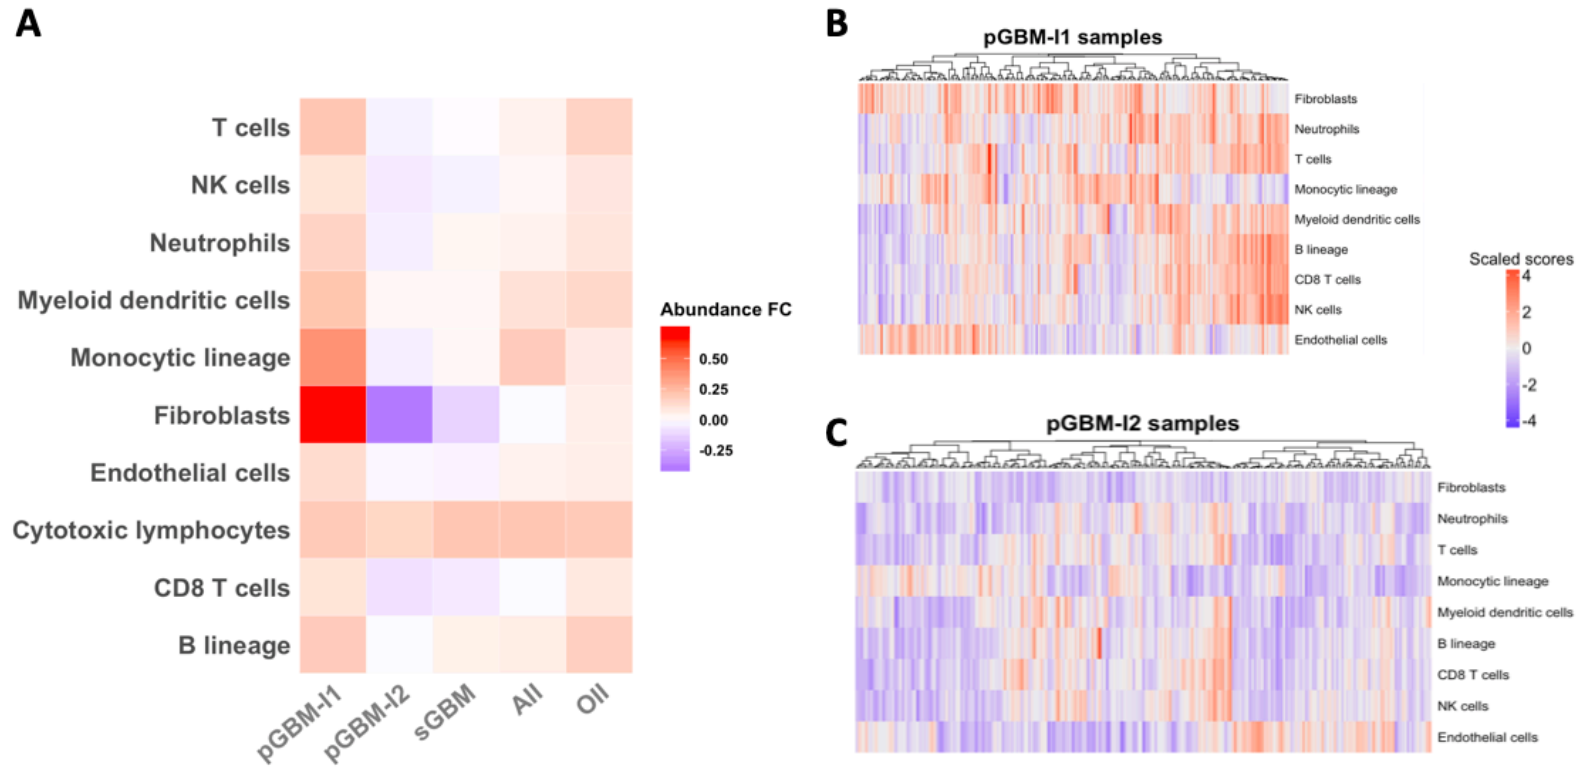

**Supplementary Figure 2:** Estimation of tumor infiltration across samples of the exploratory cohort. (A) Abundance fold-changes (FC), *i.e.* average infiltration scores in tumors - averages infiltration score in normal samples. Red color indicates a higher infiltration in tumors, compared to normal, while blue color underlines a lower infiltration in tumors. Heatmaps of MCPcounter scores in (B) pGBM-I1 and (C) pGBM-I2 samples. Columns are ordered using a hierarchical clustering procedure, using 1-Pearson's correlation as a measure of distance between samples.

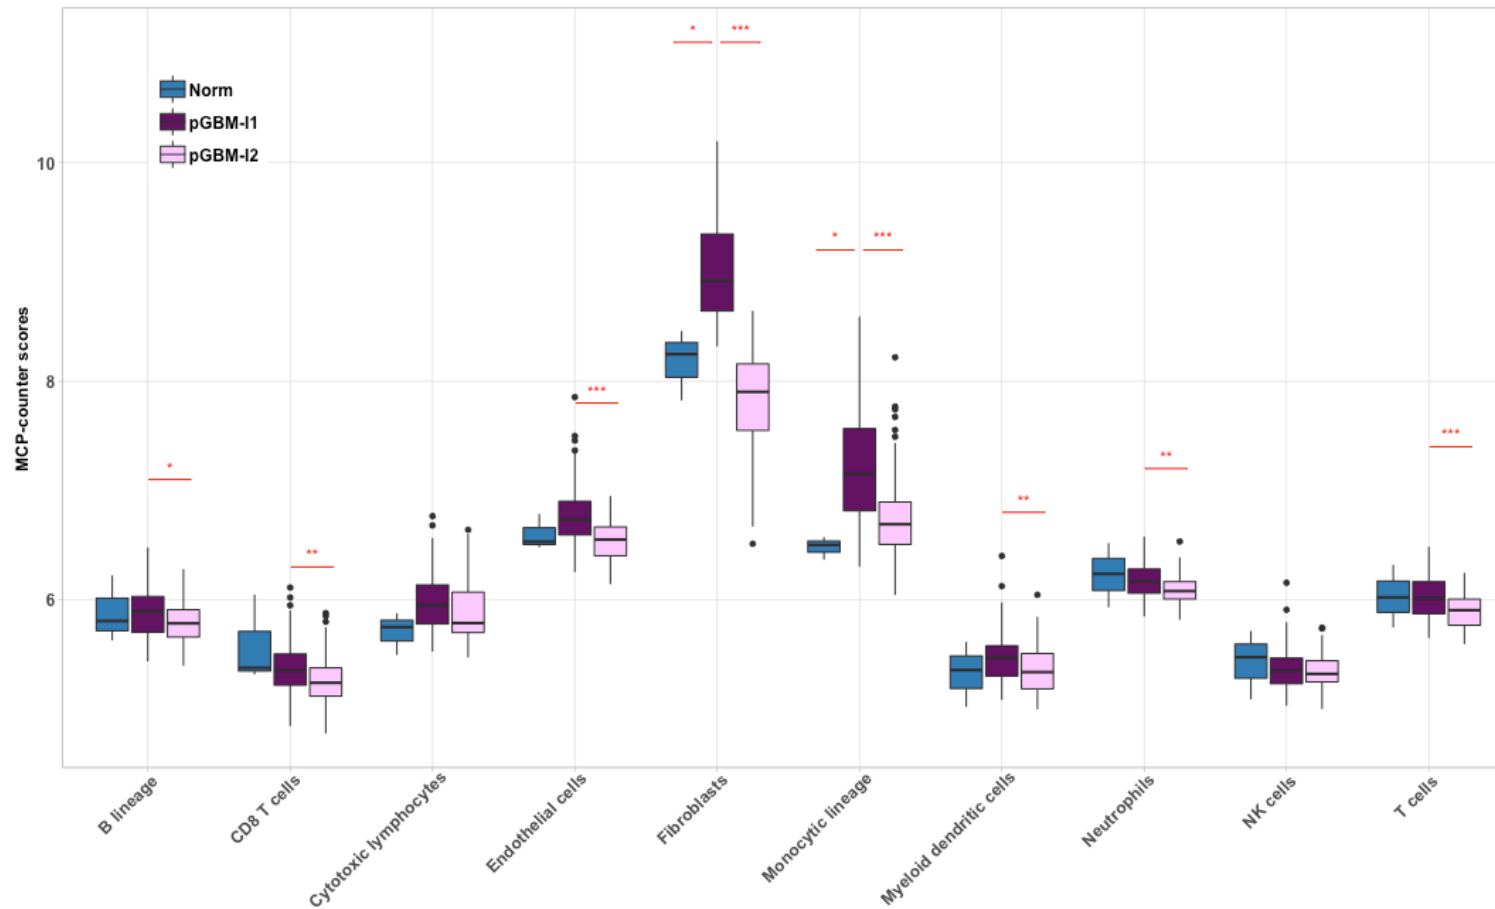

**Supplementary Figure 3:** Differential abundance of immune and stromal cell populations between pGBM-I1 (n=57) and pGBM-I2 (n=67), in the validation dataset. FDR values from limma (Benjamini-Hochberg procedure) are indicated for each comparison. Legend: (\*) FDR<0.05, (\*\*) FDR<0.01, (\*\*\*) FDR<0.001.

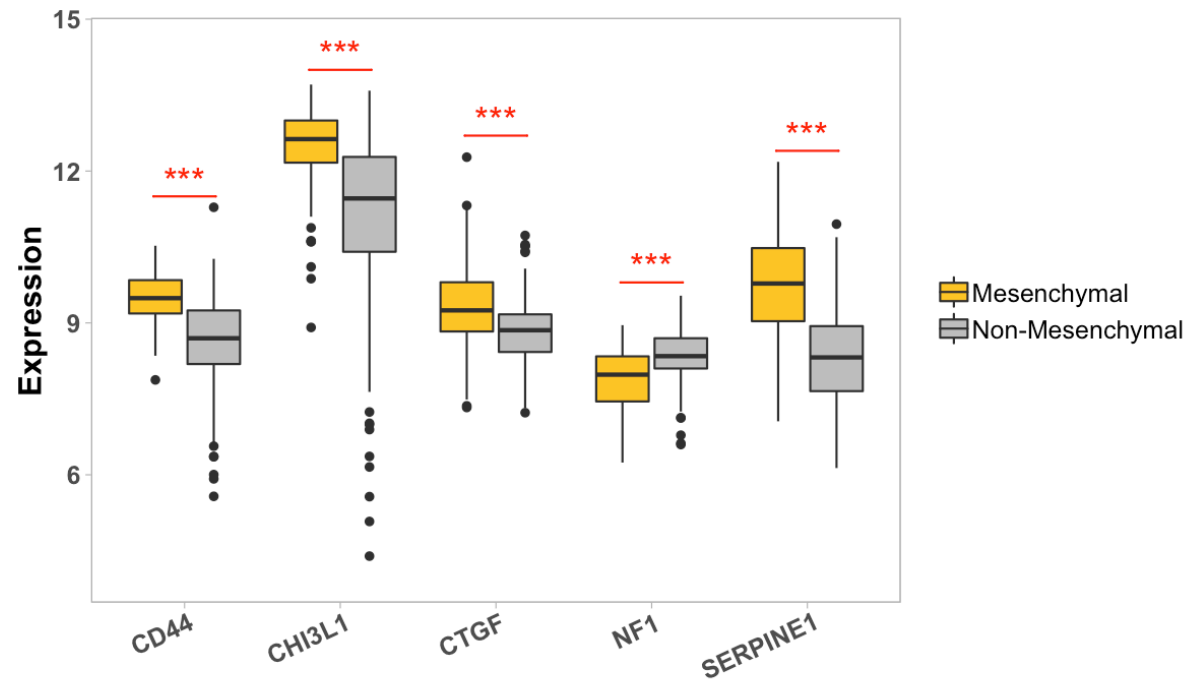

**Supplementary Figure 4:** Expression levels of selected genes in the mesenchymal subtype vs. other subtypes (neural, proneural and classical) in the exploratory cohort. FDR values from limma (Benjamini-Hochberg procedure) are indicated for each comparison. Legend: (\*) FDR<0.05, (\*\*) FDR<0.01, (\*\*\*) FDR<0.001.

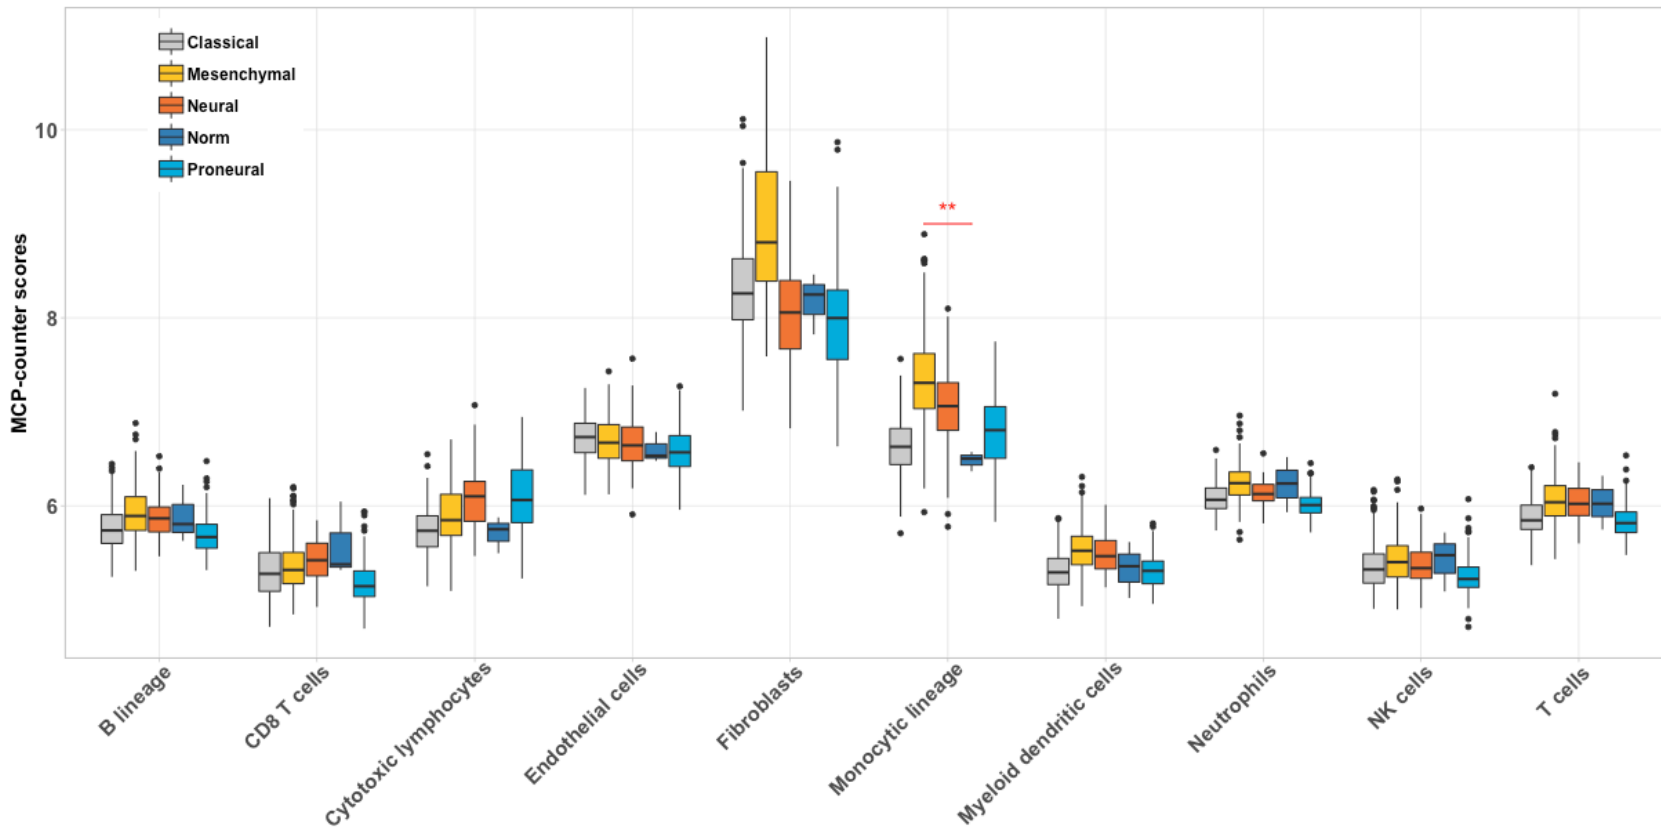

**Supplementary Figure 5:** Comparison of abundance of immune and stromal cell populations in the pGBM molecular subtypes (exploratory cohort).

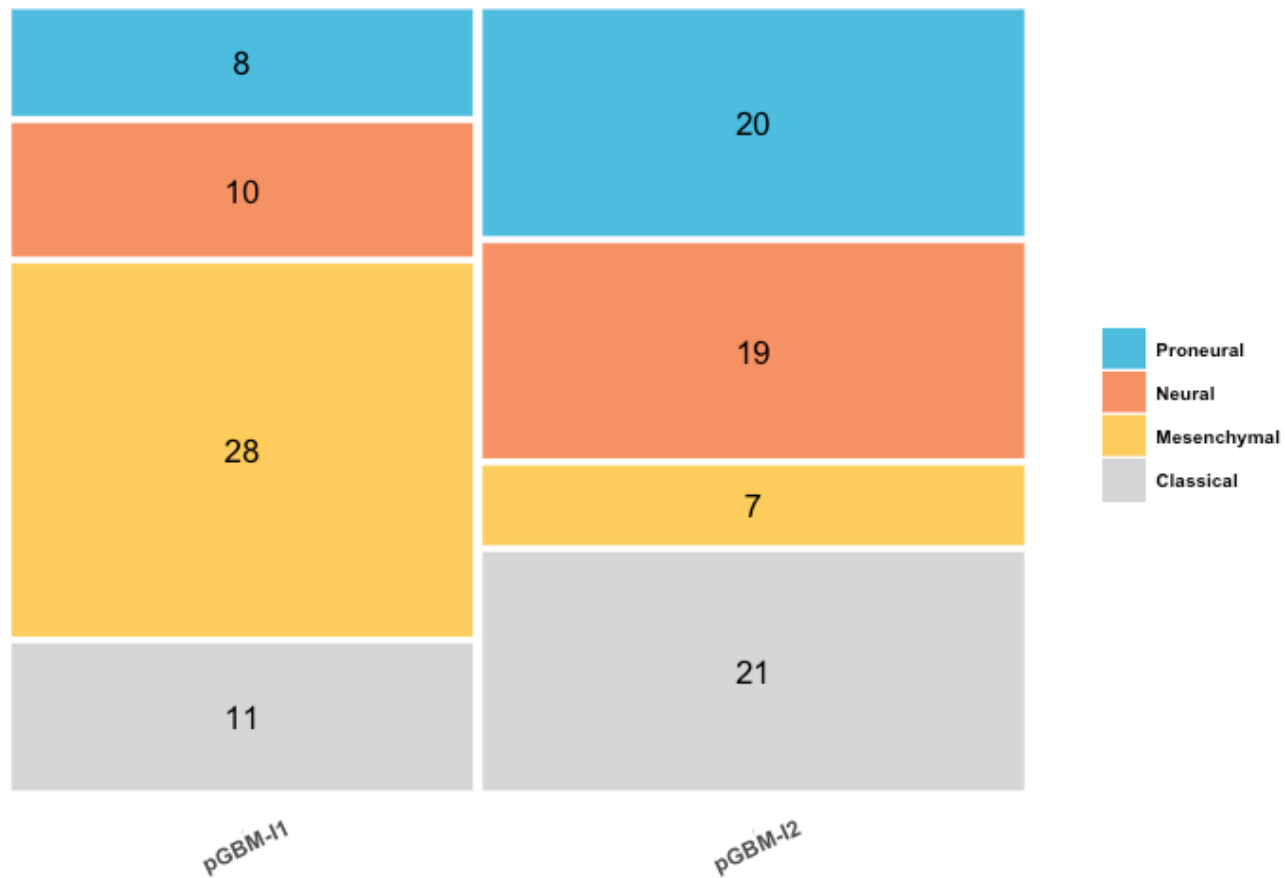

**Supplementary Figure 6:** Molecular characterization of the pGBM-I1 (n=57) and pGBM-I2 (n=67) clusters according to the Verhaak's signatures in the validation dataset.



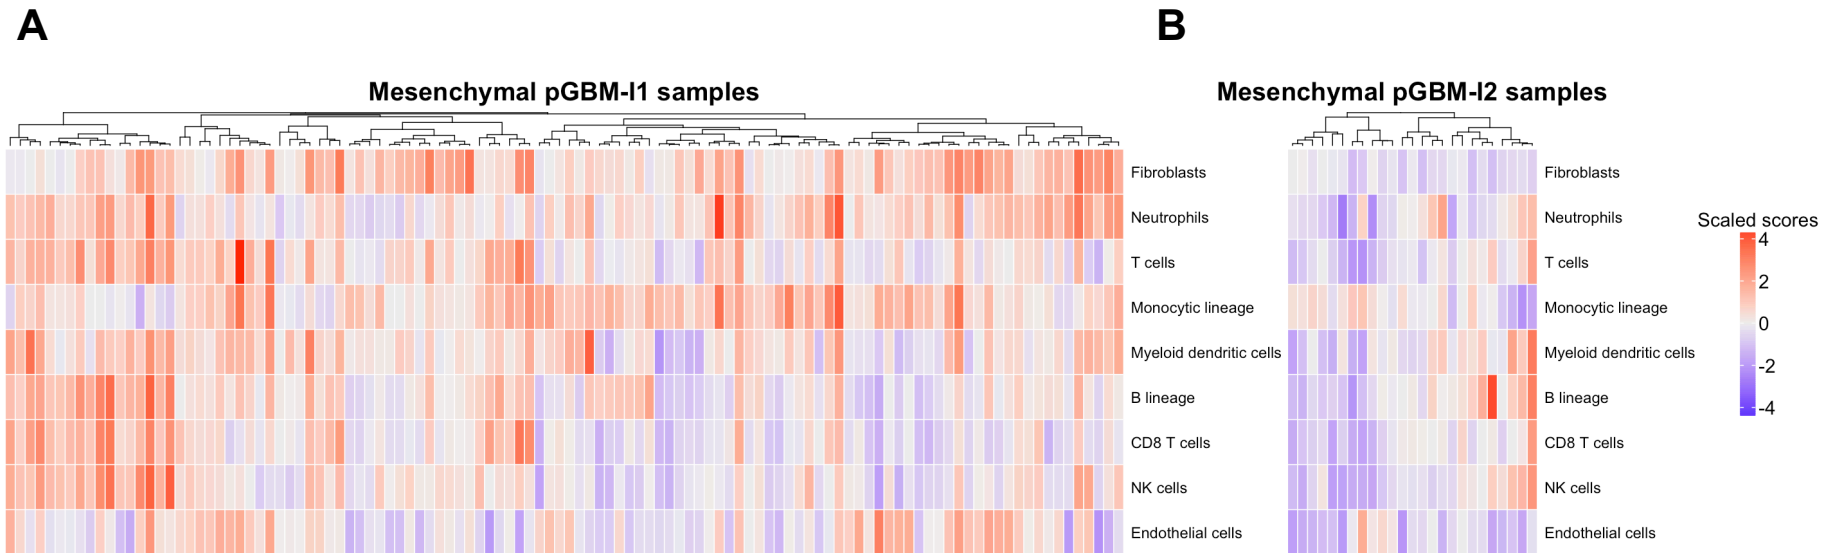

**Supplementary Figure 7:** Heatmaps of MCPcounter scores in mesenchymal tumors of the exploratory cohort (A) pGBM-I1 and (B) pGBM-I2. Columns are ordered using a hierarchical clustering procedure, using 1-Pearson's correlation as a measure of distance between samples.

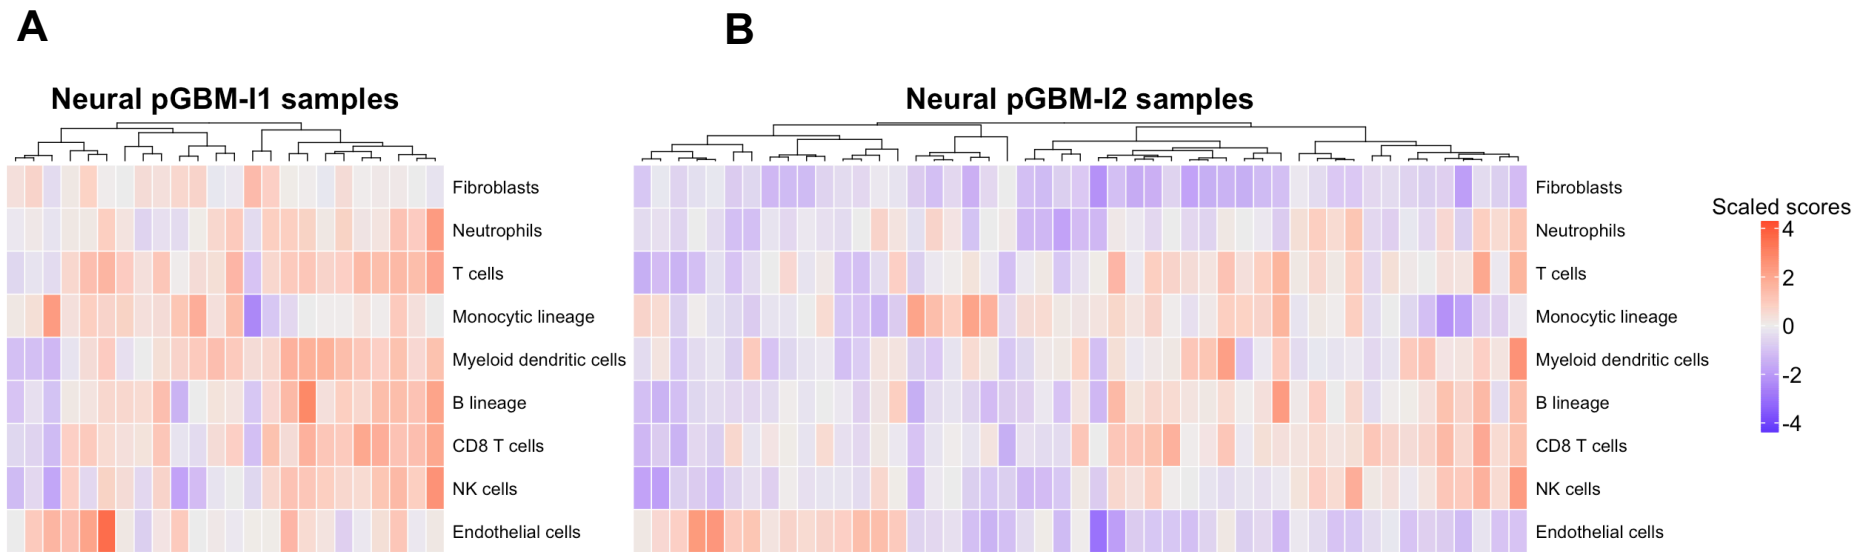

**Supplementary Figure 8:** Heatmaps of MCPcounter scores in neural tumors of the exploratory cohort (A) pGBM-I1 and (B) pGBM-I2. Columns are ordered using a hierarchical clustering procedure, using 1-Pearson's correlation as a measure of distance between samples.

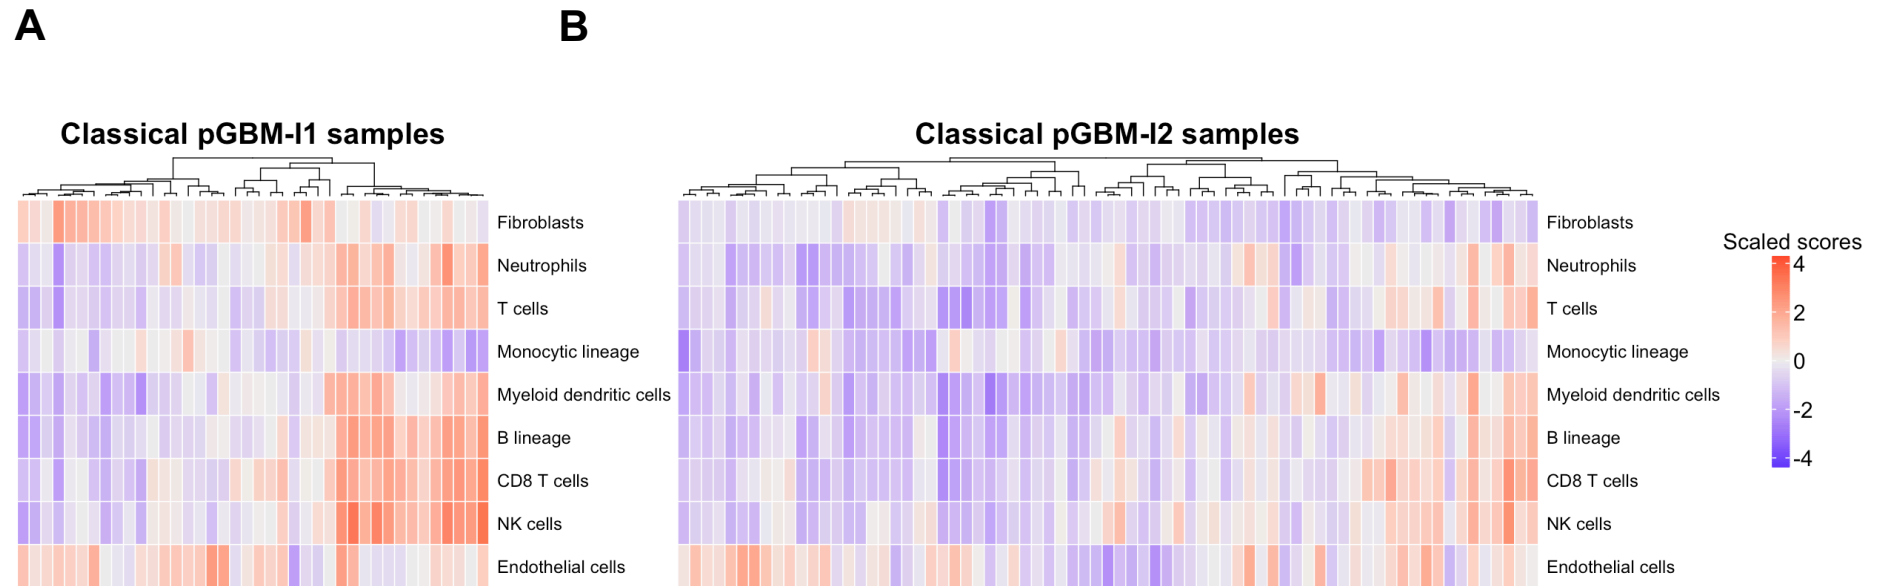

**Supplementary Figure 9:** Heatmaps of MCPcounter scores in classical tumors of the exploratory cohort (A) pGBM-I1 and (B) pGBM-I2. Columns are ordered using a hierarchical clustering procedure, using 1-Pearson's correlation as a measure of distance between samples.

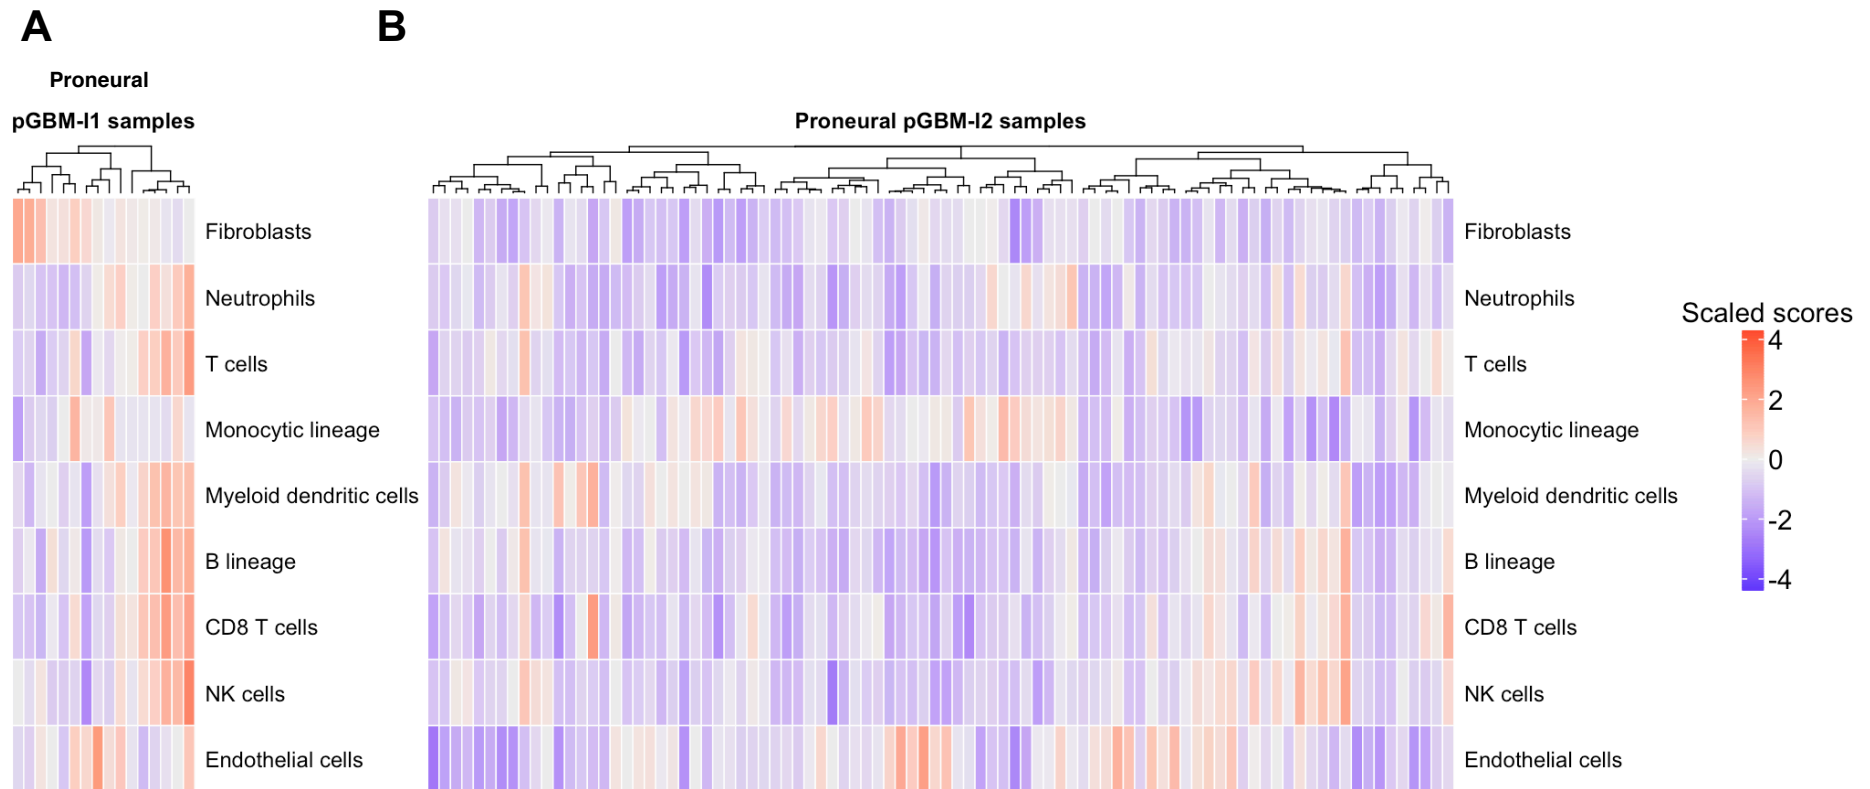

**Supplementary Figure 10:** Heatmaps of MCPcounter scores in proneural tumors of the exploratory cohort (A) pGBM-I1 and (B) pGBM-I2. Columns are ordered using a hierarchical clustering procedure, using 1-Pearson's correlation as a measure of distance between samples.

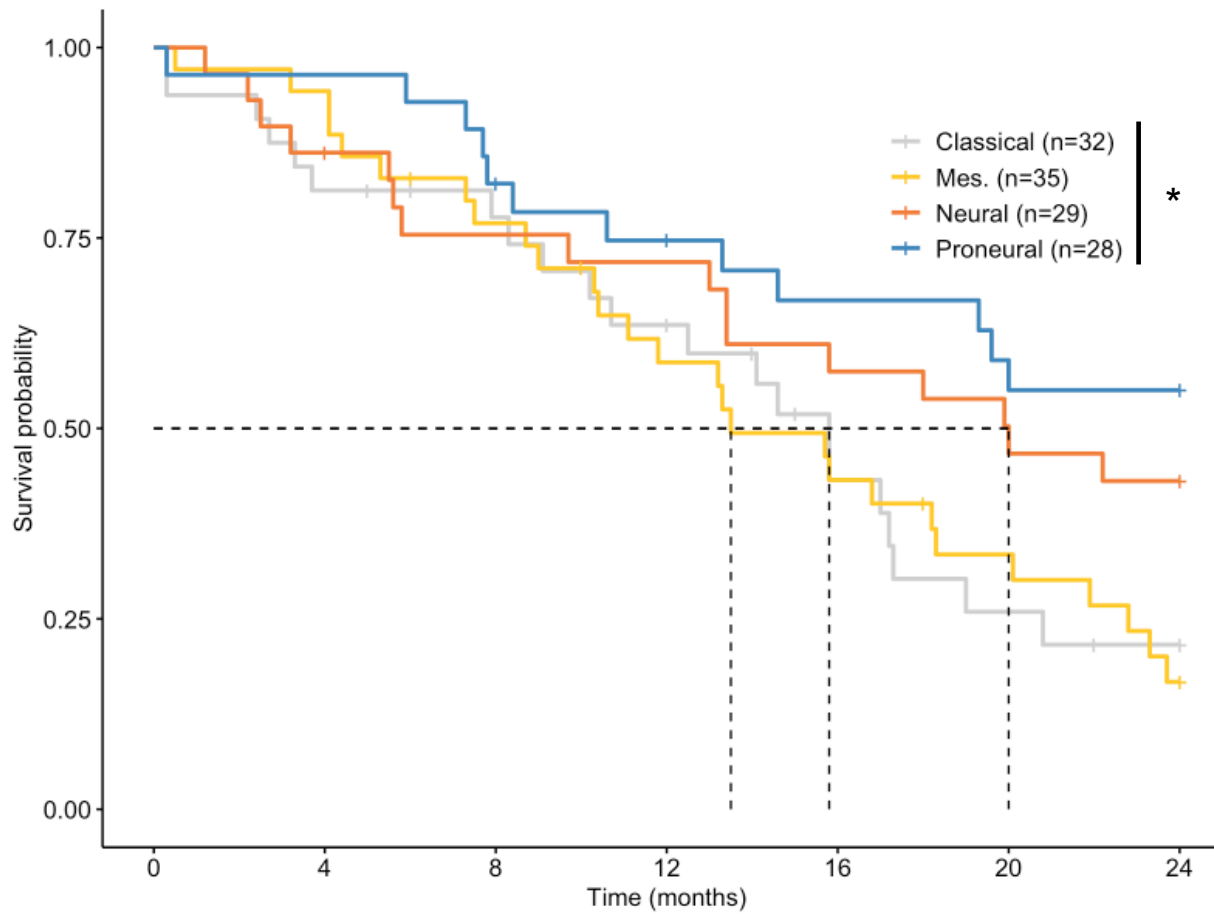

**Supplementary Figure 11:** Kaplan-Meier curves modeling the effect of GBM molecular classification on survival in the validation cohort.

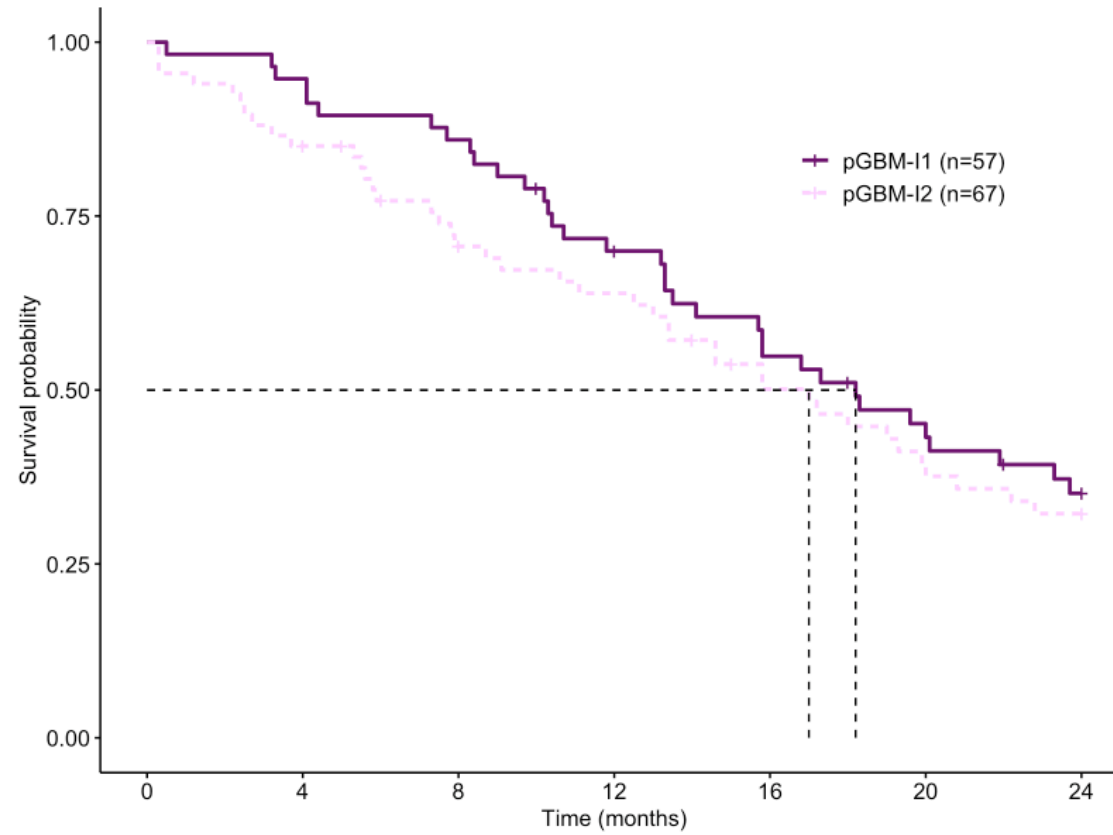

**Supplementary Figure 12:** Kaplan-Meier curves modeling the effect of tumor infiltration on overall survival in the validation cohort.

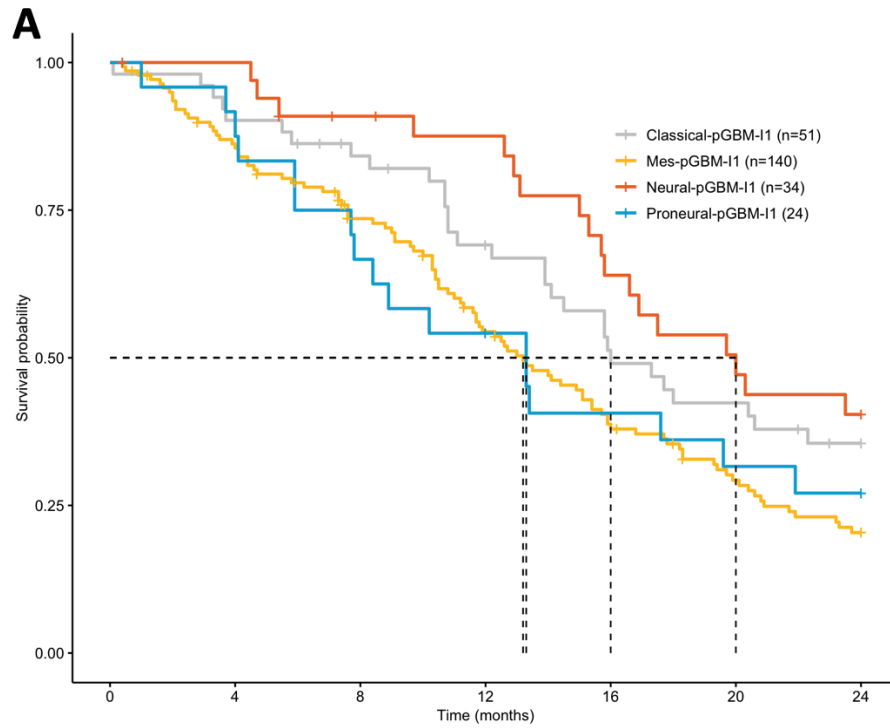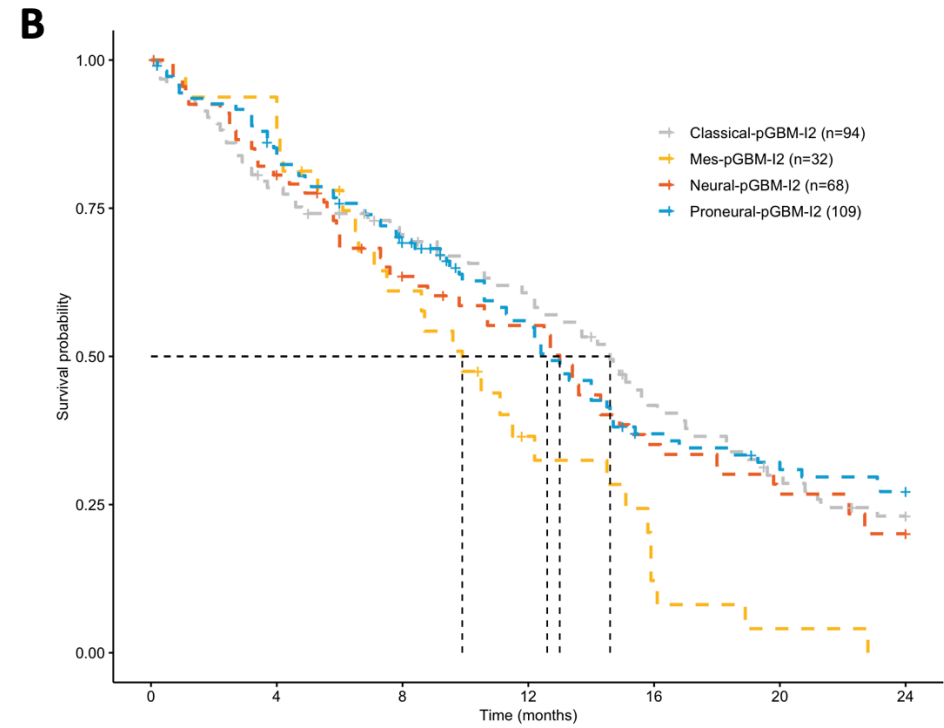

**Supplementary Figure 13:** Effect of molecular subtypes on survival, in the pooled exploratory and validation cohorts, in (A) pGBM-I1 and (B) pGBM-I2.
